# Supplementary material for: An unusual reaction of α-alkoxyphosphonium salts with Grignard reagents under an O2 atmosphere
Source: Royal Society of Chemistry journal article supplement (doi:10.1039/c1cc13919c), 2011-01-01
Supplement: c1cc13919c.pdf [file c1cc13919c.pdf]

## **An unusual reaction of $\alpha$ -alkoxyphosphonium salts with Grignard reagents under an O<sub>2</sub> atmosphere**

Hiromichi Fujioka\*, Akihiro Goto, Kazuki Ohtake, Ozora Kubo, Yoshinari Sawama and  
Tomohiro Maegawa

*Graduate School of Pharmaceutical Sciences, Osaka University, 1-6 Yamada-oka, Suita,  
Osaka 565-0871, Japan*

### **General**

The <sup>1</sup>H and <sup>13</sup>C NMR spectra were measured by JEOL JNM-GX 500, JNM-ECS 400 and JNM-AL 300 spectrometers with tetramethylsilane as an internal standard at 25 °C. The <sup>19</sup>F and <sup>31</sup>P NMR spectra were measured by JNM-ECS 400 spectrometers at 25 °C. IR spectra were recorded by SHIMADZU FTIR-8400 or IRAffinity-1 using a diffuse reflectance measurement of samples dispersed in KBr powder. High resolution mass spectra were recorded by JEOL LMS-D 300 spectrometers. Merck silica gel 60 (230-400 mesh) or Kanto Chemical Silicagel 60 (spherical, 63-210  $\mu$ m) was used for column chromatography.

### **Materials**

Acetals **1a**, **1c**, **1f**, **1g**, **1h**, **1i**, **1j** and **1k** were synthesized from commercially available corresponding aldehydes and alcohols. Acetal **1m** was prepared according to the literature procedure.<sup>1</sup> Grignard reagents **3b**, **3c** and **3d** were prepared from commercially available corresponding aryl bromide and Mg turning with titration using Paquette's method.<sup>2</sup> <sup>18</sup>O-methanol and <sup>18</sup>O<sub>2</sub> gas were purchased from Taiyo Nissan Co. Ltd. and used without further purification. Other reagents including **1b**, **1d**, and **1e** were commercially available and used without further purification.

### **General procedure for the preparation of acetals **1a**, **1c**, **1f-k**, and **1m**.**<sup>1,3</sup>

A solution of aldehyde (1 equiv), 10-camphorsulfonic acid (0.15 equiv) and alcohol

(50 equiv) in dry  $\text{CH}_2\text{Cl}_2$  (0.1 M) was stirred at room temperature. After checking for the disappearance of the aldehyde on TLC, sat.  $\text{NaHCO}_3$  aq. was added to the reaction mixture and the solution was extracted with  $\text{CH}_2\text{Cl}_2$ . The organic layer was washed with brine, dried over  $\text{Na}_2\text{SO}_4$ , filtered, and then evaporated under vacuum. The residue was purified by flash column chromatography on  $\text{SiO}_2$  to give the acetal **1**.

***n*-Dodecanal dimethyl acetal (1a)**<sup>3</sup>: eluent (hexane- $\text{CH}_2\text{Cl}_2$  = 3/2); colorless oil;  $^1\text{H}$  NMR ( $\text{CDCl}_3$ ):  $\delta$  0.88 (3H, t,  $J$  = 7.0 Hz), 1.26-1.33 (18H, brm), 1.56-1.61 (2H, m), 3.31 (6H, s), 4.36 (1H, t,  $J$  = 5.5 Hz).

***p*-Tolaldehyde dimethyl acetal (1c)**<sup>4</sup>: eluent (hexane-AcOEt = 10/1); colorless oil;  $^1\text{H}$  NMR ( $\text{CDCl}_3$ ):  $\delta$  2.35 (3H, s), 3.32 (6H, s), 5.36 (1H, s), 7.17 (2H, d,  $J$  = 8.5 Hz), 7.33 (2H, d,  $J$  = 8.5 Hz).

***p*-(Trifluoromethyl)benzaldehyde dimethyl acetal (1f)**<sup>4</sup>: eluent (hexane- $\text{CH}_2\text{Cl}_2$  = 3/2); colorless oil;  $^1\text{H}$  NMR ( $\text{CDCl}_3$ ):  $\delta$  3.33 (6H, s), 5.44 (1H, s), 7.58 (2H, d,  $J$  = 8.0 Hz), 7.63 (2H, d,  $J$  = 8.0 Hz).

**Thiophene-2-carbaldehyde dimethyl acetal (1g)**<sup>5</sup>: eluent (hexane-AcOEt = 10/1); yellow oil;  $^1\text{H}$  NMR ( $\text{CDCl}_3$ ):  $\delta$  3.36 (6H, s), 5.64 (1H, s), 7.01 (1H, dd,  $J$  = 5.0, 3.7 Hz), 7.08 (1H, dd,  $J$  = 3.7, 1.4 Hz), 7.30 (1H, dd,  $J$  = 5.0, 1.4 Hz).

**2-Phenyl-1,3-dioxolane (1h)**<sup>6</sup>: eluent (hexane-AcOEt = 20/1); colorless oil;  $^1\text{H}$  NMR ( $\text{CDCl}_3$ ):  $\delta$  4.02-4.15 (4H, m), 5.82 (1H, s), 7.36-7.41 (3H, m), 7.46-7.50 (2H, m).

**Benzaldehyde diisopropyl acetal (1i)**<sup>6</sup>: eluent (hexane- $\text{CH}_2\text{Cl}_2$  = 3/2); colorless oil;  $^1\text{H}$  NMR ( $\text{CDCl}_3$ ):  $\delta$  1.17 (3H, d,  $J$  = 6.0 Hz), 1.20 (3H, d,  $J$  = 6.0 Hz), 3.90 (2H, sep,  $J$  = 6.0 Hz), 5.55 (1H, s), 7.27-7.37 (3H, m), 7.46-7.49 (2H, m).

**3-Phenylpropionaldehyde dimethyl acetal (1j)**<sup>3</sup>: eluent (hexane-AcOEt = 10/1); colorless oil;  $^1\text{H}$  NMR ( $\text{CDCl}_3$ ):  $\delta$  1.89-1.96 (2H, m), 2.66 (2H, t,  $J$  = 8.0 Hz), 3.33 (6H, s), 4.36 (1H, t,  $J$  = 5.7 Hz), 7.16-7.31 (5H, m).

**2-Methylundecanal dimethyl acetal (1k)**<sup>7</sup>: eluent (hexane-AcOEt = 10/1); colorless oil;  $^1\text{H}$  NMR ( $\text{CDCl}_3$ ):  $\delta$  0.88 (3H, t,  $J$  = 6.8 Hz), 1.07-1.10 (1H, m), 1.26-1.37 (14H, m), 1.46-1.57 (1H, m), 1.69-1.74 (1H, m), 3.35 (6H, s), 4.02 (1H, d,  $J$  = 6.4 Hz).

**5-Bromopentanal dimethyl acetal (1m)**<sup>1</sup>: eluent (hexane-AcOEt = 10/1); colorless oil; <sup>1</sup>H NMR (CDCl<sub>3</sub>): δ 1.47-1.54 (2H, m), 1.61-1.65 (2H, m), 1.86-1.93 (2H, m), 3.33 (6H, s), 3.41 (2H, t, *J* = 7.0 Hz), 4.37 (1H, t, *J* = 5.8 Hz).

**2,2-Dimethyldecanal dimethyl acetal (1l)**<sup>8</sup>:

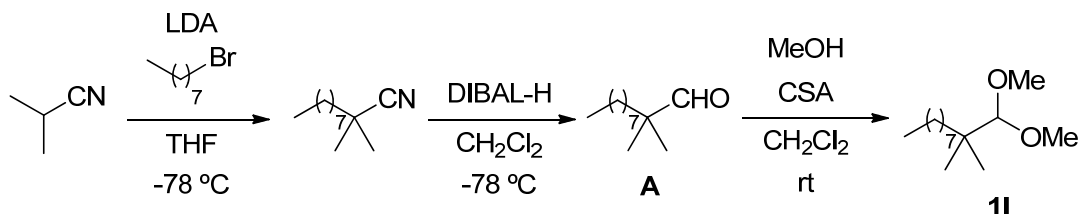

The aldehyde **A** was synthesized according to the literature procedure.<sup>9</sup> To a solution of diisopropylamine (5.5 ml, 39 mmol) in anhydrous THF (40 mL) was added *n*-butyl lithium (1.66 M solution in hexane, 24 mL, 39 mmol) at -78 °C, and the mixture was stirred for 10 min. Then, isobutyronitrile (4.1 g, 60 mmol) was added to the mixture, which was stirred for 20 min. 1-Bromooctane (5.8 g, 30 mmol) was added and the mixture was stirred for 30 min. Sat. NH<sub>4</sub>Cl aq. was added to the reaction mixture, and the resulting solution was extracted with AcOEt. Organic layer was dried over anhydrous Na<sub>2</sub>SO<sub>4</sub>. After removal of the solvent, the residue was subjected to silica-gel column chromatography using hexane-AcOEt (40/1) as the eluent to give 2,2-dimethyldecanenitrile (4.9 g, 90%) as colorless oil; IR (KBr, cm<sup>-1</sup>): 2236, 1794, 1470, 1369, 1096; <sup>1</sup>H NMR (CDCl<sub>3</sub>): δ 0.89 (3H, t, *J* = 6.7 Hz), 1.28-1.33 (10H, m), 1.33 (6H, s), 1.45-1.53 (4H, m); <sup>13</sup>C NMR (CDCl<sub>3</sub>): δ 14.1, 22.6, 25.2, 26.7, 29.2, 29.3, 29.6, 31.8, 32.4, 41.1, 125.3; HRFABMS calcd for C<sub>14</sub>H<sub>30</sub>O<sub>2</sub>Na (M<sup>+</sup>+H): 182.1909, found: 182.1915. To a solution of 2,2-dimethyldecanenitrile (1.8 g, 10 mmol) in anhydrous CH<sub>2</sub>Cl<sub>2</sub> (50 mL) was added DIBAL-H (1.05 M solution in hexane, 14 mL, 15 mmol) at -78 °C, and the reaction mixture was stirred for 2 h at the same temperature. 1 N HCl aq. (10 mL) added to the solution at -78 °C, then the mixture was warmed to room temperature, and additional 1 N HCl aq. (10 mL) was added. The resulting solution was extracted with CH<sub>2</sub>Cl<sub>2</sub>, and the organic layer was dried over anhydrous Na<sub>2</sub>SO<sub>4</sub>. After removal of the solvent, the residue was subjected to silica-gel column chromatography using hexane-AcOEt (40/1) as the eluent to give 2,2-dimethyldecanal<sup>10</sup> (1.4 g, 76%); <sup>1</sup>H NMR (CDCl<sub>3</sub>): δ 0.88 (3H, t, *J* = 6.9 Hz), 1.04 (6H, s), 1.19-1.33 (12H, brn), 1.43-1.47 (2H, m), 9.45 (1H, s). 2,2-Dimethyldecanal

dimethyl acetal (**11**) was prepared according to the general procedure; eluent (hexane-AcOEt = 20/1); colorless oil; IR (KBr,  $\text{cm}^{-1}$ ): 1794, 1470, 1387, 1186, 1072;  $^1\text{H}$  NMR ( $\text{CDCl}_3$ ):  $\delta$  0.86 (6H, s), 0.88 (3H, t,  $J = 6.4$  Hz), 1.24-1.30 (14H, brn), 3.50 (6H, s), 3.82 (1H, s);  $^{13}\text{C}$  NMR ( $\text{CDCl}_3$ ):  $\delta$  14.1, 21.9, 22.7, 23.6, 29.3, 29.7, 30.7, 31.9, 37.8, 39.3, 58.5, 114.1; HRFABMS calcd for  $\text{C}_{14}\text{H}_{30}\text{O}_2\text{Na}$  ( $\text{M}^+ + \text{Na}$ ): 253.2143, found: 253.2135.

### Synthesis and isolation of the $\alpha$ -methoxyphosphonium salt **2a** (Scheme 1)

In a flame-dried two-necked Schrenk tube under  $\text{N}_2$ , TESOTf (1.92 mmol, 0.43 mL) was added slowly to a stirred solution of **1a** (0.96 mmol, 221 mg) and  $\text{Ph}_3\text{P}$  (2.88 mmol, 755 mg) in dry  $\text{CH}_2\text{Cl}_2$  (5 mL) at  $0^\circ\text{C}$  and the resulting solution was stirred for 0.5 h at the same temperature. After checking for the disappearance of **1a** and the formation of the  $\alpha$ -methoxyphosphonium salt on TLC, sat.  $\text{NaHCO}_3$  aq. was added to the reaction mixture. The resulting solution was extracted with  $\text{CH}_2\text{Cl}_2$ . The organic layer was dried over anhydrous  $\text{Na}_2\text{SO}_4$ . After removal of the solvent, the residue was subjected to neutral silica-gel column chromatography (eluent;  $\text{CH}_2\text{Cl}_2$ -MeOH = 10/1) to give **2a** (395 mg, 67%) as colorless gummy oil.

**(1-Methoxydodecyl)triphenylphosphonium trifluoromethanesulfonate (2a)**: IR (KBr,  $\text{cm}^{-1}$ ): 2926, 2361, 2340, 1439, 1260, 1155, 1030;  $^1\text{H}$  NMR ( $\text{CDCl}_3$ ):  $\delta$  0.87 (3H, t,  $J = 6.9$  Hz), 1.21-1.30 (15H, m), 1.61-1.74 (4H, m), 1.85-1.90 (1H, m), 3.51 (3H, s), 5.80 (1H, dt,  $J = 9.6, 3.0$  Hz), 7.68-7.73 (6H, m), 7.79-7.88 (9H, m);  $^{13}\text{C}$  NMR ( $\text{CDCl}_3$ ):  $\delta$  13.8, 22.3, 25.8, 26.0, 29.0, 29.09, 29.14, 29.2, 31.5, 32.0, 32.1, 62.7 (d,  $J_{\text{C-P}} = 6.7$  Hz), 78.1 (d,  $J_{\text{C-P}} = 59.4$  Hz), 116.5 (d,  $J_{\text{C-P}} = 81.4$  Hz), 120.6 (d,  $J_{\text{C-F}} = 320.2$  Hz), 130.1 (d,  $J_{\text{C-P}} = 11.6$  Hz), 134.0 (d,  $J_{\text{C-P}} = 9.6$  Hz), 134.9 (d,  $J_{\text{C-P}} = 2.9$  Hz);  $^{19}\text{F}$  NMR ( $\text{CDCl}_3$ ):  $\delta$  -78.1;  $^{31}\text{P}$  NMR ( $\text{CDCl}_3$ ):  $\delta$  22.0; HRFABMS (positive) calcd for  $\text{C}_{31}\text{H}_{42}\text{OP}$  ( $\text{M}^+$ ): 461.2973, found: 461.2993; HRFABMS (negative) calcd for  $\text{CO}_3\text{F}_3\text{S}$  ( $\text{M}^-$ ): 148.9520, found: 148.9550.

### General procedure for the reaction of the $\alpha$ -methoxyphosphonium salt **2b** with Grignard reagents (Table 2)

In a flame-dried two-necked Schrenk tube with dry air, TESOTf (2 equiv) was added slowly to a stirred solution of **1b** (1 equiv) and  $\text{Ph}_3\text{P}$  (3 equiv) in dry  $\text{CH}_2\text{Cl}_2$  (0.2 M) at

0 °C and the resulting solution was stirred for 0.5 h at the same temperature. After checking for the disappearance of **1b** and the formation of the  $\alpha$ -methoxyphosphonium salt on TLC, **3a-d** (5.0 equiv) was added quickly to the mixture, and the solution was then stirred at the same temperature. After checking for the disappearance of the  $\alpha$ -methoxyphosphonium salt on TLC, sat. NH<sub>4</sub>Cl aq. was added to the reaction mixture. The resulting solution was extracted with CH<sub>2</sub>Cl<sub>2</sub>. The organic layer was dried over anhydrous Na<sub>2</sub>SO<sub>4</sub>. After removal of the solvent, the residue was subjected to silica-gel column chromatography to give the products **4**. All products **4b-e** are known compounds.

**Benzhydryl (4b)**<sup>11</sup> (**entry 1**): eluent (benzene-MeOH = 20/1); white solid; <sup>1</sup>H NMR (CDCl<sub>3</sub>):  $\delta$  2.30 (1H, brs), 5.81 (1H, s), 7.23-7.38 (10H, m).

**Phenyl(*p*-tolyl)methanol (4c)**<sup>11</sup> (**entry 2**): eluent (benzene-MeOH = 20/1); colorless oil; <sup>1</sup>H NMR (CDCl<sub>3</sub>):  $\delta$  2.31 (3H, s), 2.31 (1H, s), 5.75 (1H, s), 7.12 (2H, d,  $J$  = 7.8 Hz), 7.22-7.25 (3H, m), 7.29 (2H, d,  $J$  = 7.8 Hz), 7.32-7.36 (2H, m).

**(4-Methoxyphenyl)phenylmethanol (4d)**<sup>11</sup> (**entry 3**): eluent (benzene-MeOH = 20/1); colorless oil; <sup>1</sup>H NMR (CDCl<sub>3</sub>):  $\delta$  2.22 (1H, d,  $J$  = 2.8 Hz), 3.78 (3H, s), 5.79 (1H, d,  $J$  = 2.8 Hz), 6.84-6.87 (2H, m), 7.23-7.38 (7H, m).

**(4-Fluorophenyl)phenylmethanol (4e)**<sup>11</sup> (**entry 4**): eluent (benzene-MeOH = 20/1); colorless oil; <sup>1</sup>H NMR (CDCl<sub>3</sub>):  $\delta$  2.30 (1H, s), 5.80 (1H, s), 6.98-7.03 (2H, m), 7.24-7.34 (7H, m).

#### **General procedure for the reaction of the $\alpha$ -methoxyphosphonium salt with PhMgBr **3a** (Table 3)**

In a flame-dried two-necked Schrenk tube with dry air, TESOTf (2 equiv) was added slowly to a stirred solution of acetal **1** (1 equiv) and Ph<sub>3</sub>P (3 equiv) in dry CH<sub>2</sub>Cl<sub>2</sub> (0.2 M) at 0 °C and the resulting solution was stirred for 0.5 h at the same temperature. After checking for the disappearance of **1** and the formation of the  $\alpha$ -methoxyphosphonium salt on TLC, **3a** (5.0 equiv) was added quickly to the mixture, and the solution was then stirred at the same temperature. After checking for the disappearance of the  $\alpha$ -methoxyphosphonium salt on TLC, sat. NH<sub>4</sub>Cl aq. was added to the reaction mixture.

The resulting solution was extracted with CH<sub>2</sub>Cl<sub>2</sub>. The organic layer was dried over anhydrous Na<sub>2</sub>SO<sub>4</sub>. After removal of the solvent, the residue was subjected to silica-gel column chromatography to give the products **4**. Products **4h-k** and **4n** are known compounds.

**1-Phenyldodecan-1-ol (4a)**<sup>12</sup> (**entry 8**): eluent (hexane-AcOEt = 7/1); white solid; IR (KBr, cm<sup>-1</sup>): 3605, 3383, 1815, 1454; <sup>1</sup>H NMR (CDCl<sub>3</sub>): δ 0.88 (3H, t, *J* = 6.9 Hz), 1.24-1.43 (18H, m), 1.66-1.83 (2H, m), 1.89 (1H, s), 4.64 (1H, t, *J* = 6.6 Hz), 7.24-7.36 (5H, m); <sup>13</sup>C NMR (CDCl<sub>3</sub>): δ 14.1, 22.7, 25.8, 29.3, 29.52, 29.54, 29.58, 29.60, 29.63, 31.9, 39.1, 74.7, 125.9, 127.5, 128.4, 144.9; HRFABMS calcd for C<sub>18</sub>H<sub>30</sub>ONa (M<sup>+</sup>+Na): 285.2194, found: 285.2167.

**(4-Bromophenyl)phenylmethanol (4h)**<sup>11</sup> (**entry 3**): eluent (hexane-AcOEt = 5/1); colorless oil; <sup>1</sup>H NMR (CDCl<sub>3</sub>): δ 2.43 (1H, s), 5.74 (1H, s), 7.19-7.36 (7H, m), 7.42-7.44 (2H, m).

**(4-Trifluoromethylphenyl)phenylmethanol (4i)**<sup>11</sup> (**entry 4**): eluent (hexane-AcOEt = 10/1); colorless oil; <sup>1</sup>H NMR (CDCl<sub>3</sub>): δ 2.40 (1H, s), 5.85 (1H, s), 7.27-7.35 (5H, m), 7.49 (2H, d, *J* = 8.2 Hz), 7.58 (2H, d, *J* = 8.2 Hz).

**Phenyl(2-thienyl)methanol (4j)**<sup>11</sup> (**entry 5**): eluent (hexane-AcOEt = 10/1); pale yellow solid; <sup>1</sup>H NMR (CDCl<sub>3</sub>): δ 2.44 (1H, d, *J* = 3.4 Hz), 6.05 (1H, d, *J* = 3.4 Hz), 6.88 (1H, d, *J* = 3.1 Hz), 6.94 (1H, dd, *J* = 4.9, 3.1 Hz), 7.26 (1H, dd, *J* = 4.9, 1.2 Hz), 7.29-7.32 (1H, m), 7.37 (2H, t, *J* = 7.3 Hz), 7.45 (2H, dd, *J* = 7.3, 1.8 Hz).

**1,3-Diphenylpropan-1-ol (4k)**<sup>13</sup> (**entry 9**): eluent (hexane-AcOEt = 7/1); colorless oil; <sup>1</sup>H NMR (CDCl<sub>3</sub>): δ 1.92 (1H, d, *J* = 3.2 Hz), 2.01-2.13 (2H, m), 2.65-2.74 (2H, m), 4.65-4.68 (1H, m), 7.16-7.38 (10H, m).

**2-Methyl-1-phenylundecan-1-ol (diastereo mixture) (4l) (entry 10)**: eluent (hexane-AcOEt = 10/1); colorless oil; IR (KBr, cm<sup>-1</sup>): 3605, 3445, 2930, 2249, 1815, 1493, 1454, 1377, 1015; <sup>1</sup>H NMR (CDCl<sub>3</sub>): δ 0.74 (1.2H, d, *J* = 6.9 Hz), 0.87 (1.8H, dd, *J* = 5.5, 1.4 Hz), 0.90 (3H, t, *J* = 6.6 Hz), 1.04-1.41 (16H, m), 1.75-1.87 (2H, m), 4.42 (0.4H, d, *J* = 6.9 Hz), 4.52 (0.6H, d, *J* = 5.5 Hz), 7.23-7.35 (5H, m); <sup>13</sup>C NMR (CDCl<sub>3</sub>): δ 14.1, 14.3, 15.6, 22.7, 27.0, 27.2, 29.31, 29.33, 29.58, 29.60, 29.7, 29.8, 29.9, 31.88, 31.90, 32.2, 33.1, 40.09, 40.14, 78.2, 79.1, 126.3, 126.7, 127.2, 127.4, 128.12, 128.13,

143.6, 143.9; HRFABMS calcd for  $C_{18}H_{30}ONa$  ( $M^+ + Na$ ): 285.2194, found: 285.2195.

**2,2-Dimethyl-1-phenyldecan-1-ol (4m)<sup>14</sup> (entry 11):** eluent (hexane-AcOEt = 10/1); pale yellow oil; IR (KBr,  $cm^{-1}$ ): 3609, 1794, 1468, 1385, 1096;  $^1H$  NMR ( $CDCl_3$ ):  $\delta$  0.81 (3H, s), 0.88 (3H, t,  $J = 6.6$  Hz), 0.89 (3H, s), 1.17-1.38 (14H, brm), 1.81 (1H, d,  $J = 2.3$  Hz), 4.45 (1H, d,  $J = 2.3$  Hz), 7.24-7.33 (5H, m);  $^{13}C$  NMR ( $CDCl_3$ ):  $\delta$  14.1, 22.6, 23.1, 23.9, 29.4, 29.7, 30.6, 31.9, 38.1, 38.9, 81.2, 127.2, 127.5, 127.8, 142.2; HRFABMS calcd for  $C_{18}H_{30}ONa$  ( $M^+ + Na$ ): 285.2194, found: 285.2206.

**5-Bromo-1-phenylpentan-1-ol (4n)<sup>15</sup> (entry 12):** eluent (hexane-AcOEt = 5/1); colorless oil;  $^1H$  NMR ( $CDCl_3$ ):  $\delta$  1.40-1.46 (1H, m), 1.55-1.61 (1H, m), 1.68-1.75 (1H, m), 1.78-1.84 (1H, m), 1.88 (2H, quintet,  $J = 7.0$  Hz), 1.94 (1H, s), 3.38 (2H, t,  $J = 6.7$  Hz), 4.66 (1H, t,  $J = 6.7$  Hz), 7.25-7.37 (5H, m).

#### Isotopic labelling experiment using the $^{18}O$ -labelled dimethyl acetal 7 (Scheme 3)

**$^{18}O$ -*n*-decanal dimethyl acetal (7):** eluent (hexane- $CH_2Cl_2$  = 1/1); colorless oil;  $^1H$  NMR ( $CDCl_3$ ):  $\delta$  0.88 (3H, t,  $J = 6.6$  Hz), 1.26-1.30 (14H, brm), 1.56-1.60 (2H, m), 3.31 (6H, s), 4.36 (1H, t,  $J = 5.7$  Hz); HRFABMS calcd for  $C_{12}H_{27}^{18}O_2$  ( $M^+ + H$ ): 207.2096, found: 207.2108.

**1-Phenyldecan-1-ol (9):** eluent (hexane-AcOEt = 10/1); colorless oil;  $^1H$  NMR ( $CDCl_3$ ):  $\delta$  0.87 (3H, t,  $J = 6.6$  Hz), 1.25-1.44 (14H, brm), 1.69-1.83 (2H, m), 1.86 (1H, s), 4.63-4.68 (1H, m), 7.24-7.37 (5H, m); HRFABMS calcd for  $C_{16}H_{26}ONa$  ( $M^+ + Na$ ): 257.1881, found: 257.1884.

#### Isotopic labelling experiment with the $\alpha$ -methoxyphosphonium salt 2b and 3a under an $^{18}O_2$ atmosphere (Scheme 4)

In a flame-dried two-necked Schrenk tube with  $^{18}O_2$ , TESOTf (77  $\mu L$ , 2 equiv) was added slowly to a stirred solution of acetal **1b** (26.0 mg, 1 equiv) and  $Ph_3P$  (135 mg, 3 equiv) in dry  $CH_2Cl_2$  (0.2 M) at 0  $^\circ C$  and the resulting solution was stirred for 0.5 h at the same temperature. After checking for the disappearance of **1b** and the formation of the  $\alpha$ -methoxyphosphonium salt on TLC, **3a** (5.0 equiv) was added quickly to the mixture, and the solution was then stirred at the same temperature. After checking for the disappearance of the  $\alpha$ -methoxyphosphonium salt on TLC, sat.  $NH_4Cl$  aq. was added to the reaction mixture. The resulting solution was extracted with  $CH_2Cl_2$  and the

organic layer was dried over anhydrous  $\text{Na}_2\text{SO}_4$  and filtered. After removal of the solvent, the residue was subjected to silica-gel column chromatography to give  $^{18}\text{O}$ -benzhydrol (**10**) (16.6 mg, 52%) and  $^{18}\text{O}$ -triphenylphosphine oxide (23.3 mg, 49%).

**$^{18}\text{O}$ -benzhydrol (10):** eluent (hexane-AcOEt = 7/1); white solid;  $^1\text{H}$  NMR ( $\text{CDCl}_3$ ):  $\delta$  2.23 (1H, s), 5.84 (1H, s), 7.24-7.39 (10H, m); HRFABMS calcd for  $\text{C}_{13}\text{H}_{12}^{18}\text{ONa}$  ( $\text{M}^+ + \text{Na}$ ): 209.0823, found: 209.0819.

**$^{18}\text{O}$ -triphenylphosphine oxide:** eluent (AcOEt); white solid;  $^1\text{H}$  NMR ( $\text{CDCl}_3$ ):  $\delta$  7.44-7.49 (6H, m), 7.53-7.57 (3H, m), 7.65-7.70 (6H, m);  $^{31}\text{P}$  NMR ( $\text{CDCl}_3$ ):  $\delta$  29.7; HRFABMS calcd for  $\text{C}_{18}\text{H}_{16}^{18}\text{OP}$  ( $\text{M}^+ + \text{H}$ ): 281.0976, found: 281.0960.

$^1\text{H}$  and  $^{13}\text{C}$  NMR of 2,2-dimethyldecanenitrile

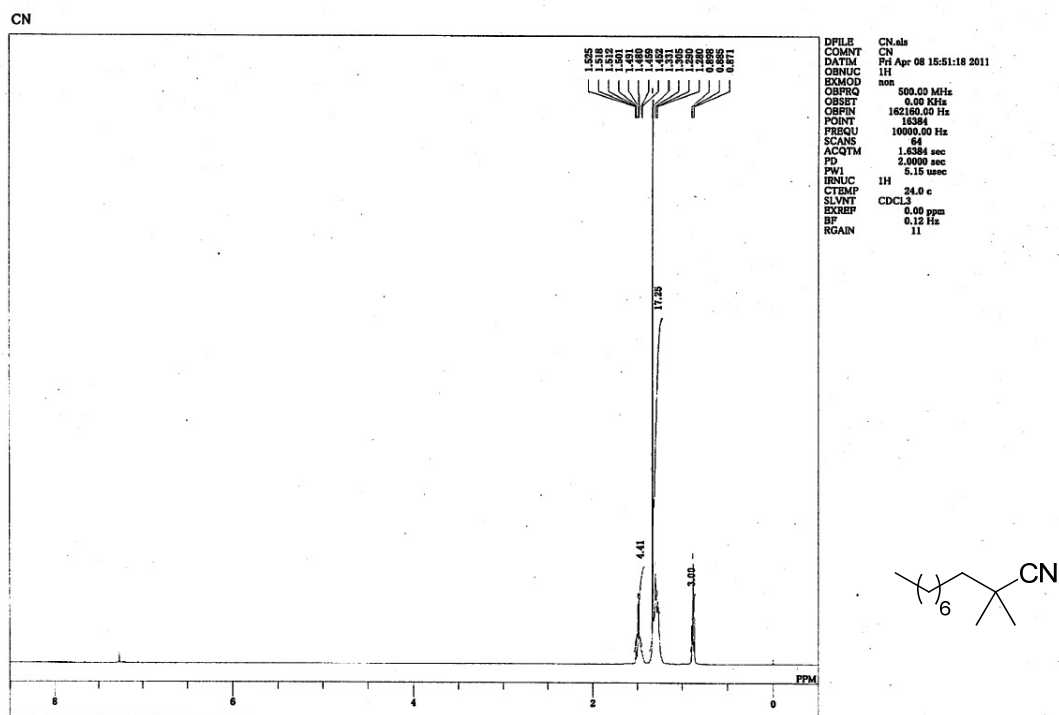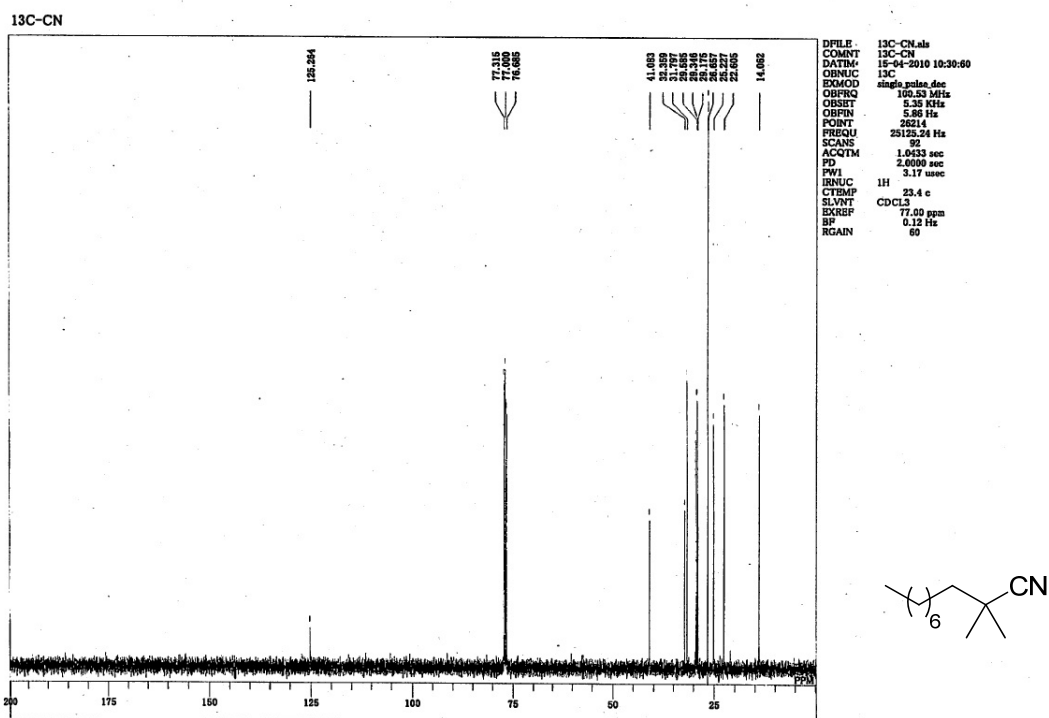

$^1\text{H}$  and  $^{13}\text{C}$  NMR of **11**

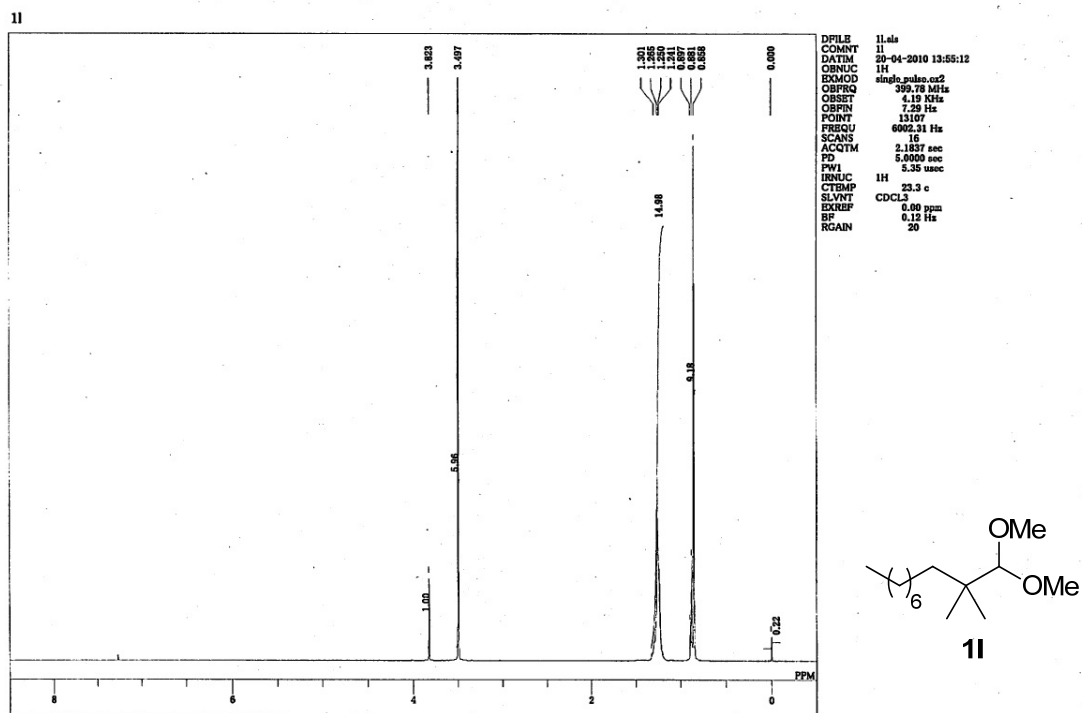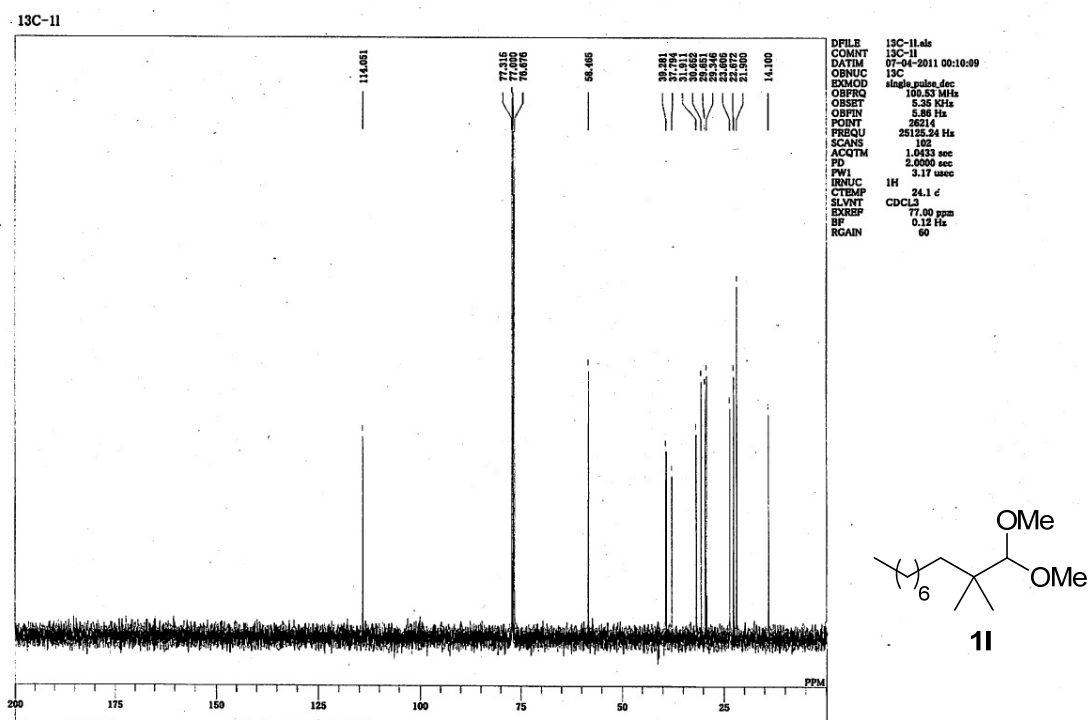



<sup>19</sup>F and <sup>31</sup>P NMR of **2a**

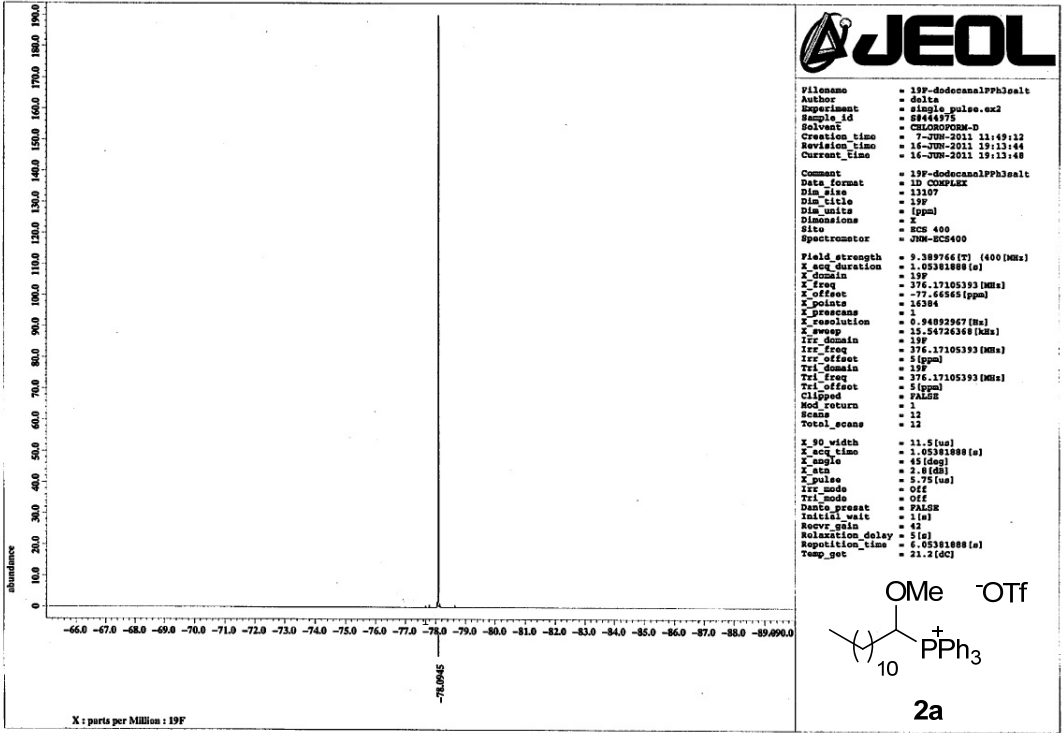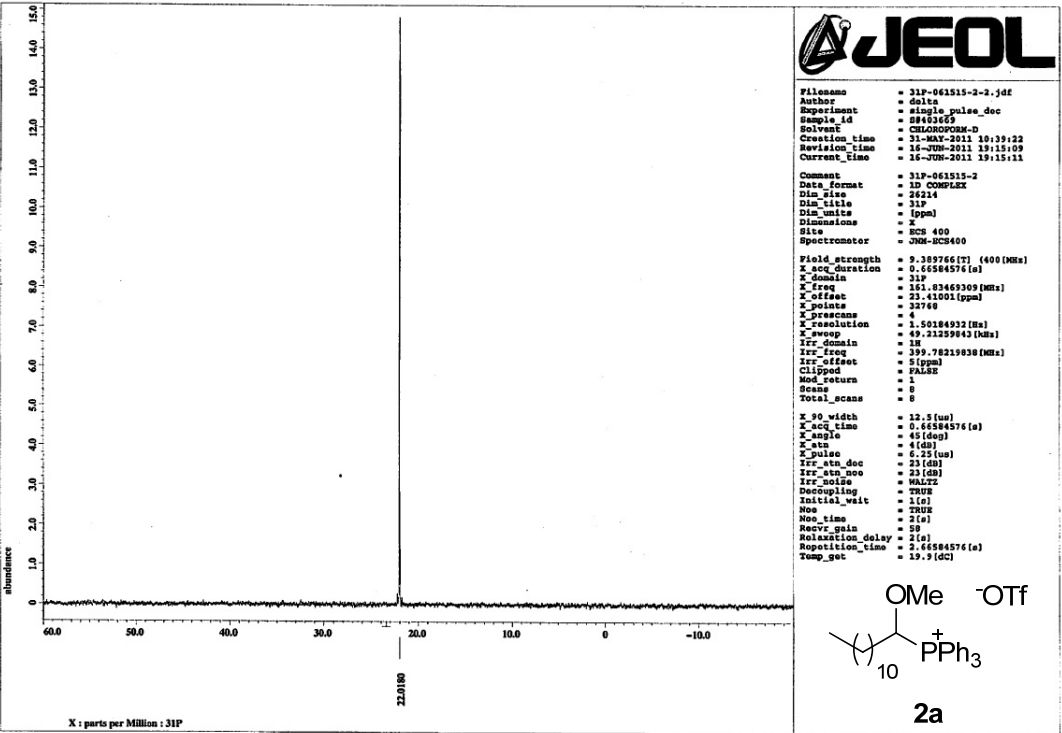

$^1\text{H}$  and  $^{13}\text{C}$  NMR of **4a**

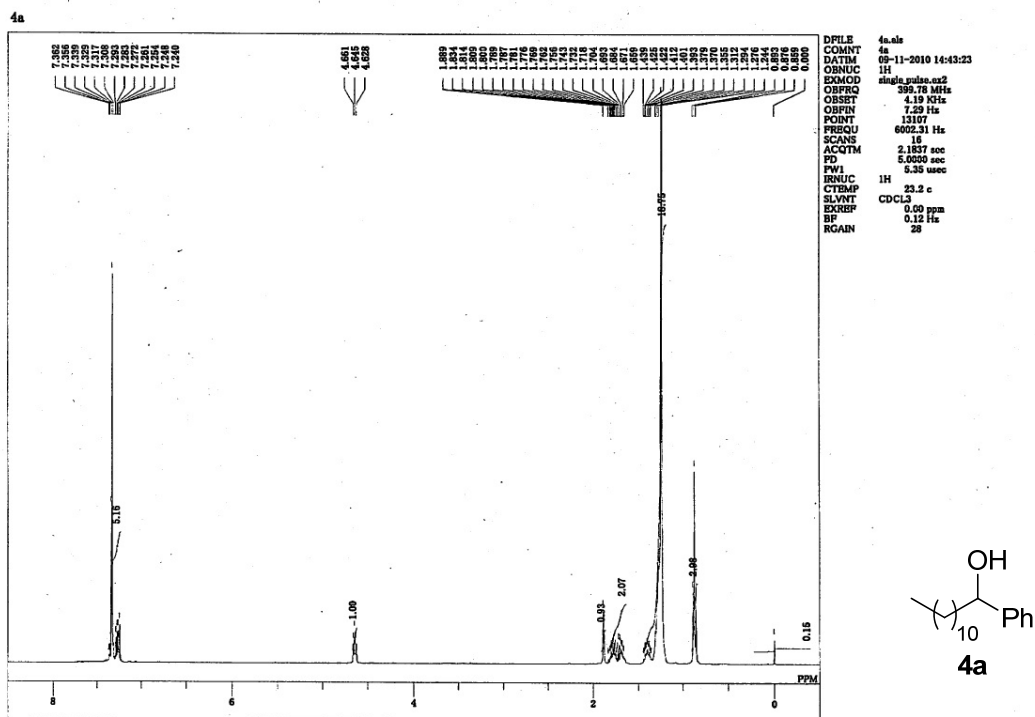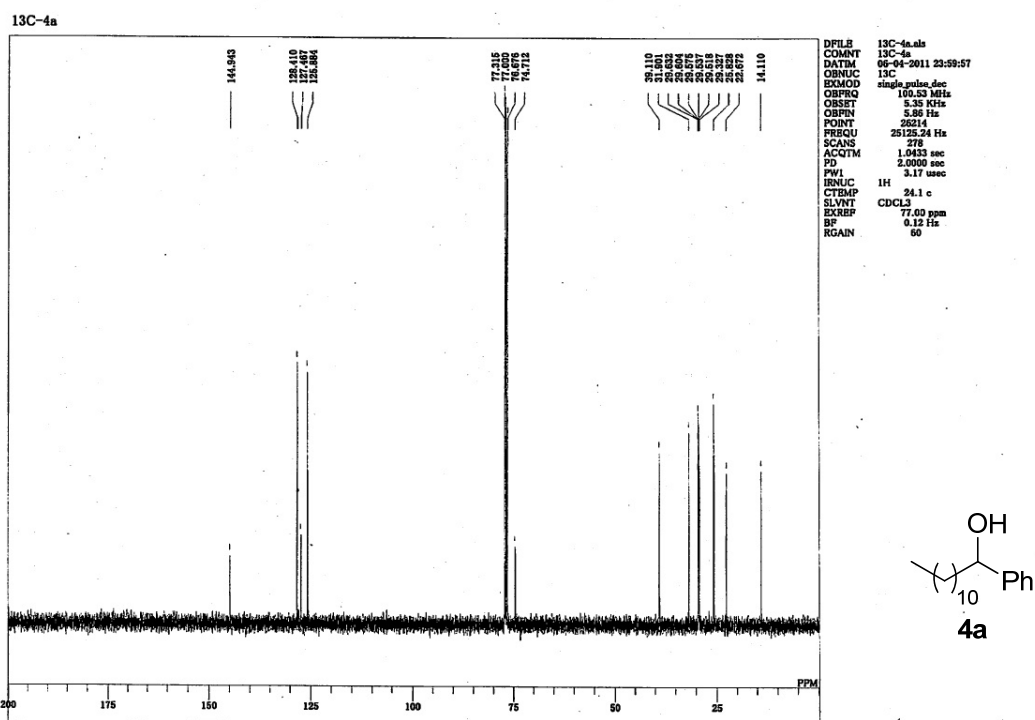

$^1\text{H}$  and  $^{13}\text{C}$  NMR of **4I**

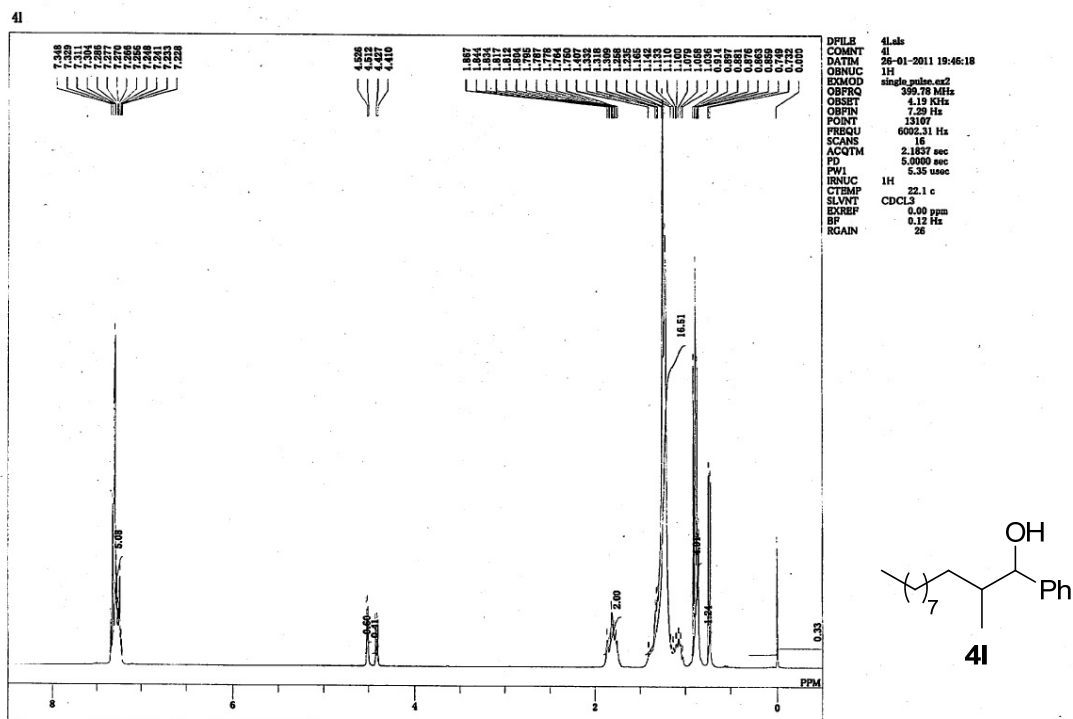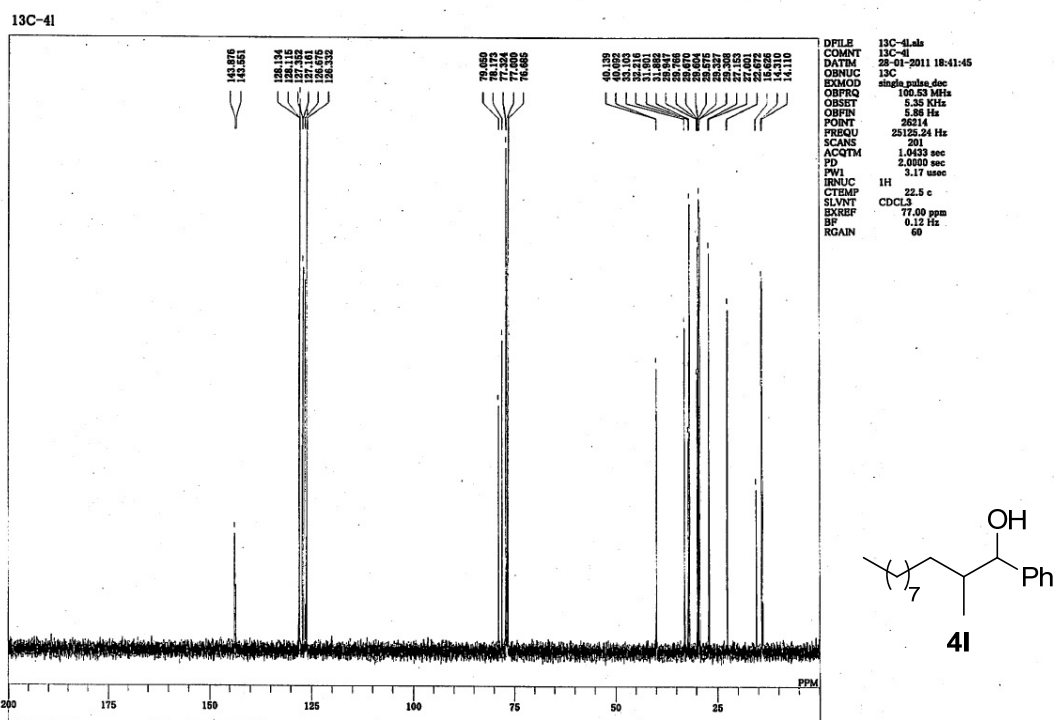

$^1\text{H}$  and  $^{13}\text{C}$  NMR of **4m**

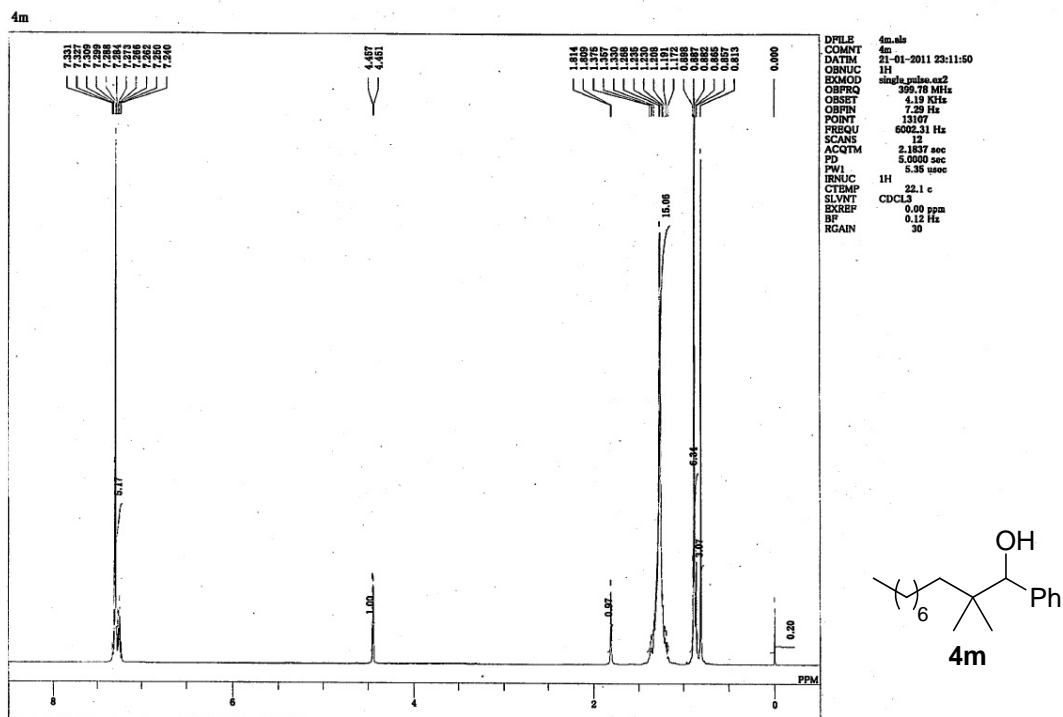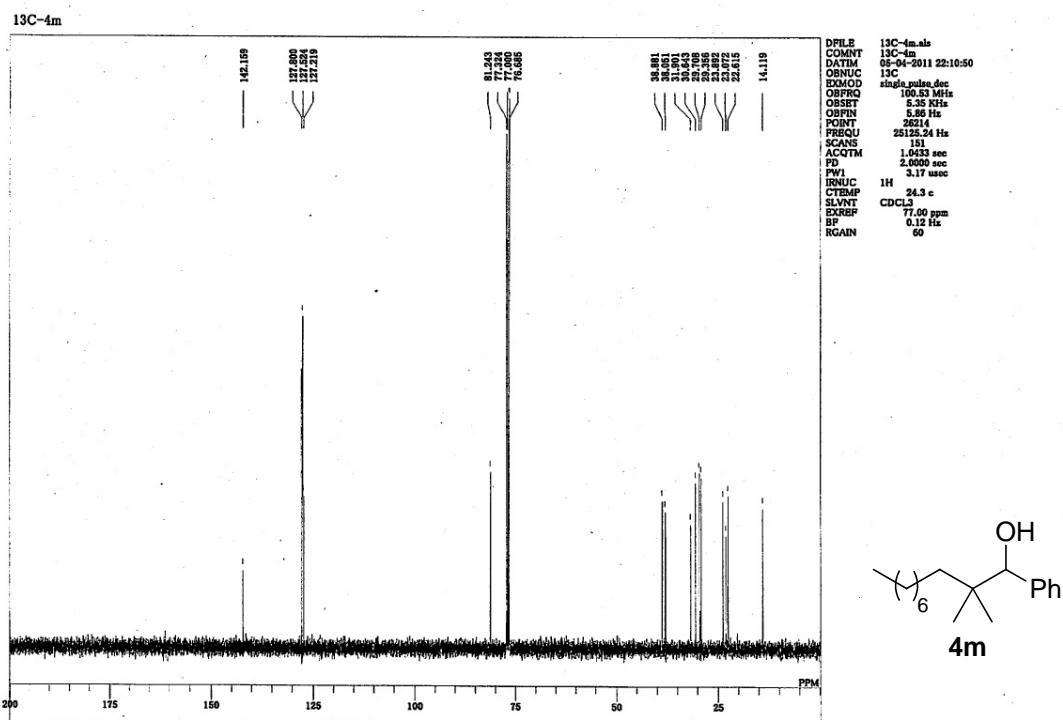

## Reference

1. M. G. N. Russell, V. G. Matassa, R. R. Pengilley, M. B. van Niel, B. Sohal, A. P. Watt, L. Hitzel, M. S. Beer, J. A. Stanton, H. B. Broughton and J. L. Castro, *J. Med. Chem.*, 1999, **42**, 4981.
2. H.-S. Lin and L. A. Paquette, *Synth. Commun.*, 1994, **24**, 2503.
3. H. Fujioka, A. Goto, K. Otake, O. Kubo, K. Yahata, Y. Sawama and T. Maegawa, *Chem. Commun.*, 2010, **46**, 3976.
4. K. M. Engell, R. A. McClelland and P. E. Sørensen, *Can. J. Chem.*, 1999, **77**, 978.
5. M. Barbero, S. Cadamuro, S. Dughera and P. Venturello, *Synthesis*, 2008, 1379.
6. Y.-J. Zhao, S.-S. Chng and T.-P. Loh, *J. Am. Chem. Soc.*, 2007, **129**, 492.
7. H. Fujioka, T. Okitsu, Y. Sawama, N. Murata, R. Li and Y. Kita, *J. Am. Chem. Soc.*, 2006, **128**, 5930.
8. T. Sato, T. Kobayashi, T. Gojo, E. Yoshida, J. Otera and H. Nozaki, *Chem. Lett.*, 1987, 1661.
9. A. J. M. Burrell, I. Coldham, L. Watson, N. Oram, C. D. Pilgram and N. G. Martin, *J. Org. Chem.*, 2009, **74**, 2290.
10. M. G. Vinogradov, I. P. Kovalev and G. I. Nikishin, *Bull. Acad. Sci. USSR, Div. Chem. Sci. (Engl. Transl.)*, 1981, 1569.
11. J. Karthikeyan, M. Jeganmohan and C.-H. Cheng, *Chem. Eur. J.*, 2010, **16**, 8989.
12. F. L. Breusch and M. Oğuzer, *Chem. Ber.*, 1954, **87**, 1225.
13. A. F. Trindade, P. M. P. Gois, L. F. Veiros, V. Andre, M. T. Duarte, C. A. M. Afonso, S. Caddick and F. G. N. Cloke, *J. Org. Chem.*, 2008, **73**, 4076.
14. J. Apolit, *Compt. Rend.*, 1921, **172**, 1493.
15. W. S. Trahanovsky and N. S. Fox, *J. Am. Chem. Soc.*, 1974, **96**, 7968.
